# Supplementary material for: Rationale for the Cytogenomics of Cardiovascular Malformations Consortium: A Phenotype Intensive Registry Based Approach
Source: PubMed Central journal article supplement (PMC5753096; doi:10.3390/jcdd2020076), 2015-04-29
Supplement: jcdd-02-00076-s001.pdf [file jcdd-02-00076-s001.pdf]

# Supplementary Materials

**Table S1. Case Report Form**

| <b>Demographics</b>                                                                                                                                              |                                                                                                                                                                                                                                                 |                  |
|------------------------------------------------------------------------------------------------------------------------------------------------------------------|-------------------------------------------------------------------------------------------------------------------------------------------------------------------------------------------------------------------------------------------------|------------------|
| <b>Date of Birth:</b>                                                                                                                                            | <div style="display: flex; justify-content: space-between; width: 100%;"> <span>□ □ □ □ - □ □ □ □ - □ □ □ □ □ □</span> </div> <div style="display: flex; justify-content: space-between; width: 100%;"> <span>M M - D D - Y Y Y Y</span> </div> |                  |
| <b>Sex:</b> <i>(select only one response)</i>                                                                                                                    | <input type="checkbox"/> Male                                                                                                                                                                                                                   |                  |
|                                                                                                                                                                  | <input type="checkbox"/> Female                                                                                                                                                                                                                 |                  |
|                                                                                                                                                                  | <input type="checkbox"/> Not Reported/Unknown                                                                                                                                                                                                   |                  |
|                                                                                                                                                                  | <input type="checkbox"/> Hispanic or Latino                                                                                                                                                                                                     |                  |
| <b>Ethnicity:</b> <i>(select only one response)</i>                                                                                                              | <input type="checkbox"/> Not Hispanic or Latino                                                                                                                                                                                                 |                  |
|                                                                                                                                                                  | <input type="checkbox"/> Not Reported/Unknown                                                                                                                                                                                                   |                  |
|                                                                                                                                                                  | <input type="checkbox"/> Patient Refused                                                                                                                                                                                                        |                  |
|                                                                                                                                                                  | <input type="checkbox"/> American Indian or Alaska Native                                                                                                                                                                                       |                  |
|                                                                                                                                                                  | <input type="checkbox"/> Asian                                                                                                                                                                                                                  |                  |
| <b>Race:</b> <i>(select only one response)</i>                                                                                                                   | <input type="checkbox"/> Black or African American                                                                                                                                                                                              |                  |
|                                                                                                                                                                  | <input type="checkbox"/> Native Hawaiian or Other Pacific Islander                                                                                                                                                                              |                  |
|                                                                                                                                                                  | <input type="checkbox"/> White                                                                                                                                                                                                                  |                  |
|                                                                                                                                                                  | <input type="checkbox"/> Other, specify: _____                                                                                                                                                                                                  |                  |
|                                                                                                                                                                  | <input type="checkbox"/> Not Reported/Unknown                                                                                                                                                                                                   |                  |
| <b>Medical History</b>                                                                                                                                           |                                                                                                                                                                                                                                                 |                  |
| <b>Does the Subject have any Medical History Findings to Record?</b> <span style="float: right;"><input type="checkbox"/> Yes <input type="checkbox"/> No</span> |                                                                                                                                                                                                                                                 |                  |
| <i>Only complete the CRF if data is not included in a data transfer.</i>                                                                                         |                                                                                                                                                                                                                                                 |                  |
|                                                                                                                                                                  | <b>Diagnosis</b>                                                                                                                                                                                                                                | <b>ICD9 Code</b> |
| 1.                                                                                                                                                               |                                                                                                                                                                                                                                                 |                  |
| 2.                                                                                                                                                               |                                                                                                                                                                                                                                                 |                  |
| 3.                                                                                                                                                               |                                                                                                                                                                                                                                                 |                  |
| 4.                                                                                                                                                               |                                                                                                                                                                                                                                                 |                  |
| 5.                                                                                                                                                               |                                                                                                                                                                                                                                                 |                  |
| 6.                                                                                                                                                               |                                                                                                                                                                                                                                                 |                  |
| 7.                                                                                                                                                               |                                                                                                                                                                                                                                                 |                  |
| 8.                                                                                                                                                               |                                                                                                                                                                                                                                                 |                  |
| 9.                                                                                                                                                               |                                                                                                                                                                                                                                                 |                  |
| 10.                                                                                                                                                              |                                                                                                                                                                                                                                                 |                  |
| 11.                                                                                                                                                              |                                                                                                                                                                                                                                                 |                  |
| 12.                                                                                                                                                              |                                                                                                                                                                                                                                                 |                  |
| 13.                                                                                                                                                              |                                                                                                                                                                                                                                                 |                  |
| 14.                                                                                                                                                              |                                                                                                                                                                                                                                                 |                  |
| 15.                                                                                                                                                              |                                                                                                                                                                                                                                                 |                  |
| 16.                                                                                                                                                              |                                                                                                                                                                                                                                                 |                  |
| 17.                                                                                                                                                              |                                                                                                                                                                                                                                                 |                  |
| 18.                                                                                                                                                              |                                                                                                                                                                                                                                                 |                  |
| 19.                                                                                                                                                              |                                                                                                                                                                                                                                                 |                  |
| 20.                                                                                                                                                              |                                                                                                                                                                                                                                                 |                  |
| 21.                                                                                                                                                              |                                                                                                                                                                                                                                                 |                  |
| 22.                                                                                                                                                              |                                                                                                                                                                                                                                                 |                  |
| 23.                                                                                                                                                              |                                                                                                                                                                                                                                                 |                  |
| 24.                                                                                                                                                              |                                                                                                                                                                                                                                                 |                  |

Table S1. Cont.

| <b>Cardiac Complexities (Read 1)</b> |                                                                                                                                                                                                       |
|--------------------------------------|-------------------------------------------------------------------------------------------------------------------------------------------------------------------------------------------------------|
| <b>Date of Read:</b>                 | _ _ - _ _ - _ _ _ _ <br>M M - D D - Y Y Y Y                                                                                                                                                           |
| <b>Reader's Initials:</b>            | _ _ _  (XXX, X-X)<br><input type="checkbox"/> Abnormal                                                                                                                                                |
| <b>Echo Findings:</b>                | <input type="checkbox"/> Normal                                                                                                                                                                       |
|                                      | <input type="checkbox"/> Cannot Evaluate                                                                                                                                                              |
|                                      | <input type="checkbox"/> Grossly Normal                                                                                                                                                               |
|                                      | <input type="checkbox"/> Normal study with PFO/PDA at <1yr (additional imaging not available to confirm closure)<br>(select all that apply) <input type="checkbox"/> PFO <input type="checkbox"/> PDA |
|                                      | <input type="checkbox"/> Normal based on incomplete or limited study/studies                                                                                                                          |

**Completed by:**  Cardiologist  Other Personnel

**Cardiac Malformations (Read 1)**  
*If applicable, select only one primary diagnosis from the Cardiac Malformations section. If the relevant diagnosis is not listed, choose "Other" and specify at the bottom of the chart.*

|                          | Level Three | Level Two             | Level One                   |
|--------------------------|-------------|-----------------------|-----------------------------|
| <input type="checkbox"/> | Conotruncal | Truncus               | Truncus                     |
| <input type="checkbox"/> | Conotruncal | IAA, Type B           | IAA, B                      |
| <input type="checkbox"/> | Conotruncal | IAA, nos              | IAA, nos                    |
| <input type="checkbox"/> | Conotruncal | d-TGA                 | d-TGA-IVS                   |
| <input type="checkbox"/> | Conotruncal | d-TGA                 | d-TGA-IVS + LVOTO (PS)      |
| <input type="checkbox"/> | Conotruncal | d-TGA                 | d-TGA-IVS + RVOTO (AS, COA) |
| <input type="checkbox"/> | Conotruncal | d-TGA                 | TGA nos                     |
| <input type="checkbox"/> | Conotruncal | d-TGA                 | TGA os                      |
| <input type="checkbox"/> | Conotruncal | d-TGA                 | d-TGA-VSD                   |
| <input type="checkbox"/> | Conotruncal | d-TGA                 | d-TGA-VSD + LVOTO (PS)      |
| <input type="checkbox"/> | Conotruncal | d-TGA                 | d-TGA-VSD + RVOTO (AS, COA) |
| <input type="checkbox"/> | Conotruncal | Fallot                | TOF                         |
| <input type="checkbox"/> | Conotruncal | Fallot                | TOF, absent pulmonary valve |
| <input type="checkbox"/> | Conotruncal | Fallot                | PA-VSD (TOF anatomy)        |
| <input type="checkbox"/> | Conotruncal | Fallot                | DORV-TOF type               |
| <input type="checkbox"/> | Conotruncal | DORV-TGA              | DORV-TGA type               |
| <input type="checkbox"/> | Conotruncal | DORV-other            | DORV, os                    |
| <input type="checkbox"/> | Conotruncal | DORV-other            | DORV, nos                   |
| <input type="checkbox"/> | Conotruncal | VSD, conov            | VSD conov                   |
| <input type="checkbox"/> | Conotruncal | IAA, Type B   Truncus | IAA, B + truncus            |
| <input type="checkbox"/> | AVSD        | AVSD                  | AVSD, unspecified           |
| <input type="checkbox"/> | AVSD        | AVSD                  | ASD-1                       |
| <input type="checkbox"/> | AVSD        | AVSD                  | VSD, inlet type             |
| <input type="checkbox"/> | AVSD        | AVSD                  | AVSD, complete              |
| <input type="checkbox"/> | AVSD        | AVSD                  | AVSD, transitional          |
| <input type="checkbox"/> | AVSD        | AVSD                  | AVSD + LVOTO                |
| <input type="checkbox"/> | AVSD        | AVSD                  | AVSD + RVOTO                |

Table S1. *Cont.*

| Cardiac Malformations ( <i>Read 1—continued</i> ) |             |                                  |                                  |
|---------------------------------------------------|-------------|----------------------------------|----------------------------------|
|                                                   | Level Three | Level Two                        | Level One                        |
| <input type="checkbox"/>                          | APVR        | TAPVR                            | TAPVR                            |
| <input type="checkbox"/>                          | APVR        | TAPVR                            | TAPVR + RVOTO                    |
| <input type="checkbox"/>                          | APVR        | TAPVR                            | TAPVR + LVOTO                    |
| <input type="checkbox"/>                          | APVR        | PAPVR                            | PAPVR                            |
| <input type="checkbox"/>                          | APVR        | PAPVR                            | PAPVR + RVOTO                    |
| <input type="checkbox"/>                          | APVR        | PAPVR                            | PAPVR + LVOTO                    |
| <input type="checkbox"/>                          | APVR        | Cor Triatriatum                  | Cor Triatriatum                  |
| <input type="checkbox"/>                          | LVOTO       | HLHS                             | HLHS-IVS                         |
| <input type="checkbox"/>                          | LVOTO       | HLHS                             | HLHS + VSD                       |
| <input type="checkbox"/>                          | LVOTO       | HLHS                             | HLHS + APVR                      |
| <input type="checkbox"/>                          | LVOTO       | IAA, Type A                      | IAA, A                           |
| <input type="checkbox"/>                          | LVOTO       | Coarctation                      | COA-IVS                          |
| <input type="checkbox"/>                          | LVOTO       | AS                               | AS                               |
| <input type="checkbox"/>                          | LVOTO       | AS   Coarctation                 | AS + COA                         |
| <input type="checkbox"/>                          | LVOTO       | Aortic valve malformation        | BAV - RL, RN or other            |
| <input type="checkbox"/>                          | LVOTO       | Aortic valve malformation        | Aortic Valve Malformations (nos) |
| <input type="checkbox"/>                          | LVOTO       | Mitral valve malformation        | MVP                              |
| <input type="checkbox"/>                          | LVOTO       | Mitral valve malformation        | MS                               |
| <input type="checkbox"/>                          | LVOTO       | Multiple obstruction             | Shone Anomaly variant            |
| <input type="checkbox"/>                          | RVOTO       | Pulm valve stenosis              | PVS                              |
| <input type="checkbox"/>                          | RVOTO       | Pulm valve stenosis              | PVS, nos                         |
| <input type="checkbox"/>                          | RVOTO       | Tricuspid atresia                | Tricuspid atresia, IVS           |
| <input type="checkbox"/>                          | RVOTO       | Tricuspid atresia                | Tricuspid atresia + VSD          |
| <input type="checkbox"/>                          | RVOTO       | Ebstein's                        | Ebstein                          |
| <input type="checkbox"/>                          | RVOTO       | Pulm atresia                     | PA-IVS                           |
| <input type="checkbox"/>                          | RVOTO       | Pulm atresia                     | PA, nos                          |
| <input type="checkbox"/>                          | RVOTO       | Pulm atresia                     | PA-VSD (not TOF anatomy)         |
| <input type="checkbox"/>                          | RVOTO       | Pulm atresia                     | PA-VSD, nos                      |
| <input type="checkbox"/>                          | RVOTO       | Pulm atresia   Ebstein's         | PA-IVS + Ebstein                 |
| <input type="checkbox"/>                          | RVOTO       | Tricuspid atresia   Pulm atresia | Tricuspid atresia + PA-IVS       |
| <input type="checkbox"/>                          | RVOTO       | Anatomic Peripheral PS           | Anatomic Peripheral PS           |
| <input type="checkbox"/>                          | Septal      | VSD, pm                          | VSD pm                           |
| <input type="checkbox"/>                          | Septal      | VSD, musc                        | VSD musc                         |
| <input type="checkbox"/>                          | Septal      | VSD, os/nos                      | VSD nos                          |
| <input type="checkbox"/>                          | Septal      | VSD, os/nos                      | VSD os                           |
| <input type="checkbox"/>                          | Septal      | ASD2                             | ASD2                             |
| <input type="checkbox"/>                          | Septal      | ASD, os/nos                      | ASD, nos                         |
| <input type="checkbox"/>                          | Septal      | ASD, os/nos                      | ASD, os                          |
| <input type="checkbox"/>                          | Septal      | VSD pm, musc, os/nos, conov      | VSDs multiple (pm, musc, or nos) |

Table S1. Cont.

| Cardiac Malformations (Read 1—continued) |                   |                                                                      |                                                                         |
|------------------------------------------|-------------------|----------------------------------------------------------------------|-------------------------------------------------------------------------|
|                                          | Level Three       | Level Two                                                            | Level One                                                               |
| <input type="checkbox"/>                 | Septal            | VSD pm, musc, os/nos, conov   ASD2, ASD nos/os                       | VSD (non-inlet) + ASD2/ASD nos                                          |
| <input type="checkbox"/>                 | Septal            | PFO at age > 1 yr                                                    | PFO at age ≥ 1 yr.                                                      |
| <input type="checkbox"/>                 | Septal            | PDA at age > 1 yr                                                    | PDA at age ≥ 1 yr.                                                      |
| <input type="checkbox"/>                 | Heterotaxy        | Heterotaxy                                                           | Heterotaxy or S.I.totalis, simple CVM                                   |
| <input type="checkbox"/>                 | Heterotaxy        | Heterotaxy                                                           | Heterotaxy or S.I.totalis, complex CVM                                  |
| <input type="checkbox"/>                 | Heterotaxy        | Heterotaxy                                                           | Heterotaxy or S.I.totalis, no CVM                                       |
| <input type="checkbox"/>                 | Heterotaxy        | Heterotaxy                                                           | Right Isomerism (Asplenia)                                              |
| <input type="checkbox"/>                 | Heterotaxy        | Heterotaxy                                                           | Left Isomerism (Polyplenia)                                             |
| <input type="checkbox"/>                 | Heterotaxy        | Heterotaxy                                                           | Dextrocardia + mirror image strap vessels + normal intracardiac anatomy |
| <input type="checkbox"/>                 | Complex           | SV or other complex                                                  | Multiple, complex heart anomaly                                         |
| <input type="checkbox"/>                 | Complex           | SV or other complex                                                  | SV                                                                      |
| <input type="checkbox"/>                 | Complex           | SV or other complex                                                  | SV, DILV, nos                                                           |
| <input type="checkbox"/>                 | Complex           | SV or other complex                                                  | SV, DILV, l-malposition                                                 |
| <input type="checkbox"/>                 | Complex           | SV or other complex                                                  | SV, DILV, d-malposition                                                 |
| <input type="checkbox"/>                 | Complex           | SV or other complex                                                  | SV, DIRV                                                                |
| <input type="checkbox"/>                 | Complex           | SV or other complex                                                  | SV, os                                                                  |
| <input type="checkbox"/>                 | Complex           | SV or other complex                                                  | SV, nos                                                                 |
| <input type="checkbox"/>                 | Complex           | L-TGA                                                                | L-TGA                                                                   |
| <input type="checkbox"/>                 | Complex           | L-TGA                                                                | L-TGA + RVOTO (AS, COA)                                                 |
| <input type="checkbox"/>                 | Complex           | L-TGA                                                                | L-TGA + LVOTO (PS)                                                      |
| <input type="checkbox"/>                 | Conotruncal, AVSD | d-TGA   AVSD                                                         | d-TGA-IVS + AVSD                                                        |
| <input type="checkbox"/>                 | Conotruncal, AVSD | d-TGA   AVSD                                                         | d-TGA-VSD + AVSD                                                        |
| <input type="checkbox"/>                 | Conotruncal, AVSD | Fallot   AVSD                                                        | TOF + AVSD                                                              |
| <input type="checkbox"/>                 | Conotruncal, AVSD | Fallot   AVSD                                                        | PA-VSD (TOF anatomy) + AVSD                                             |
| <input type="checkbox"/>                 | APVR, AVSD        | TAPVR   AVSD                                                         | TAVPR + AVSD                                                            |
| <input type="checkbox"/>                 | APVR, AVSD        | PAPVR   AVSD                                                         | PAVPR + AVSD                                                            |
| <input type="checkbox"/>                 | Septal, LVOTO     | VSD pm, musc, os/nos, conov   Coarctation                            | VSD (non-inlet) + COA                                                   |
| <input type="checkbox"/>                 | Septal, LVOTO     | VSD pm, musc, os/nos, conov   ASD2, ASD nos/os   AS                  | VSD (non-inlet) + ASD2/nos + AS                                         |
| <input type="checkbox"/>                 | Septal, LVOTO     | VSD pm, musc, os/nos, conov   ASD2, ASD nos/os   Coarctation         | VSD (non-inlet) + ASD2/nos + COA                                        |
| <input type="checkbox"/>                 | Septal, RVOTO     | ASD2   Pulm valve stenosis                                           | ASD + PVS                                                               |
| <input type="checkbox"/>                 | Septal, RVOTO     | VSD pm, musc, os/nos, conov   Pulm valve stenosis                    | VSD (non-inlet) + PVS                                                   |
| <input type="checkbox"/>                 | Septal, RVOTO     | VSD pm, musc, os/nos, conov   ASD2, ASD nos/os   Pulm valve stenosis | VSD (non-inlet) + ASD2/nos + PVS                                        |

**Table S1. Cont.**

| <b>Cardiac Disease (Read 1—continued)</b>                                                                                                                                                                                                                                         |                              |                                                       |
|-----------------------------------------------------------------------------------------------------------------------------------------------------------------------------------------------------------------------------------------------------------------------------------|------------------------------|-------------------------------------------------------|
| <i>If applicable, select only one primary diagnosis from the Cardiac Disease section. If the relevant diagnosis is not listed, choose “Other” and specify at the bottom of the chart.</i>                                                                                         |                              |                                                       |
| <b>Level Three</b>                                                                                                                                                                                                                                                                | <b>Level Two</b>             | <b>Level One</b>                                      |
| <input type="checkbox"/> Aortopathy                                                                                                                                                                                                                                               | Aortopathy                   | Aortic root dilation ( $z \geq 2.5$ )                 |
| <input type="checkbox"/> Aortopathy                                                                                                                                                                                                                                               | Aortopathy                   | Ascending aorta dilation ( $z \geq 2.5$ )             |
| <input type="checkbox"/> Aortopathy                                                                                                                                                                                                                                               | Aortopathy                   | Aortic sinotubular junction dilation ( $z \geq 2.5$ ) |
| <input type="checkbox"/> Arteriopathy                                                                                                                                                                                                                                             | Vascular Anomaly             | Right Aortic Arch                                     |
| <input type="checkbox"/> Arteriopathy                                                                                                                                                                                                                                             | Vascular Anomaly             | Double Aortic Arch                                    |
| <input type="checkbox"/> Arteriopathy                                                                                                                                                                                                                                             | Vascular Anomaly             | Aberrant Subclavian Artery                            |
| <input type="checkbox"/> Arteriopathy                                                                                                                                                                                                                                             | Vascular Anomaly             | PA Anomaly (nos)                                      |
| <input type="checkbox"/> Arteriopathy                                                                                                                                                                                                                                             | Vascular Anomaly             | Vascular Ring (nos)                                   |
| <input type="checkbox"/> Arteriopathy                                                                                                                                                                                                                                             | Vascular Anomaly             | Aortopulmonary Window                                 |
| <input type="checkbox"/> Arteriopathy, LVOTO                                                                                                                                                                                                                                      | Arteriopathy                 | Supravalvar AS                                        |
| <input type="checkbox"/> Coronary Anomaly                                                                                                                                                                                                                                         | Coronary Anomaly             | ALCAPA                                                |
| <input type="checkbox"/> Coronary Anomaly                                                                                                                                                                                                                                         | Coronary Anomaly             | Coronary Anomaly (nos)                                |
| <input type="checkbox"/> Cardiomyopathy                                                                                                                                                                                                                                           | Cardiomyopathy               | HCM                                                   |
| <input type="checkbox"/> Cardiomyopathy                                                                                                                                                                                                                                           | Cardiomyopathy               | DCM                                                   |
| <input type="checkbox"/> Cardiomyopathy                                                                                                                                                                                                                                           | Cardiomyopathy               | RCM                                                   |
| <input type="checkbox"/> Cardiomyopathy                                                                                                                                                                                                                                           | Cardiomyopathy               | ARVC                                                  |
| <input type="checkbox"/> Cardiomyopathy                                                                                                                                                                                                                                           | Cardiomyopathy               | LVNC                                                  |
| <input type="checkbox"/> Cardiomyopathy                                                                                                                                                                                                                                           | Left Ventricular Dysfunction | Left Ventricular Dysfunction                          |
| <b>Other (Read 1—continued)</b>                                                                                                                                                                                                                                                   |                              |                                                       |
| <i>This section is to be used when a primary diagnosis is not listed in the Cardiac Malformations and/or Cardiac Disease sections. It may also be used to record any secondary diagnoses relative to selections in the Cardiac Malformations and/or Cardiac Disease sections.</i> |                              |                                                       |
| <b>Level Three</b>                                                                                                                                                                                                                                                                | <b>Level Two</b>             | <b>Level One</b>                                      |
| <input type="checkbox"/> * Other, specify:<br>_____                                                                                                                                                                                                                               | ** Other, specify:<br>_____  | *** Other, specify:<br>_____                          |
| <input type="checkbox"/> * Other, specify:<br>_____                                                                                                                                                                                                                               | ** Other, specify:<br>_____  | *** Other, specify:<br>_____                          |
| <input type="checkbox"/> * Other, specify:<br>_____                                                                                                                                                                                                                               | ** Other, specify:<br>_____  | *** Other, specify:<br>_____                          |

\* Level 3: For “Other”, indicate any of the listed category 3 diagnoses or specify an “other” unlisted classification; \*\* Level 2: For “Other”, indicate any of the listed category 2 diagnoses or specify an “other” unlisted classification; \*\*\* Level 1: For “Other”, indicate any of the listed category 1 diagnoses or specify an “other” unlisted classification.
